# Supplementary material for: Increased Functional Connectivity between Prefrontal Cortex and Reward System in Pathological Gambling
Source: PubMed Central journal article supplement (PMC3868704; doi:10.1371/journal.pone.0084565), 2013-12-19
Supplement: pone.0084565.s005.pdf [file pone.0084565.s005.pdf]

**Table S1.**

| Seed                          | Contrast      | Anatomical region         | Side  | Cluster-level <i>p</i><br>value (corrected) | Cluster size<br>(voxels) | Voxel-level<br><i>z</i> value | MNI coordinates at peak voxel |     |     |
|-------------------------------|---------------|---------------------------|-------|---------------------------------------------|--------------------------|-------------------------------|-------------------------------|-----|-----|
|                               |               |                           |       |                                             |                          |                               | x                             | y   | z   |
| Right middle<br>frontal gyrus | mean positive | frontal pole              | R     | < .0001                                     | 26288                    | 10.7                          | 46                            | 48  | 10  |
|                               | mean negative | posterior cingulate gyrus | L     | < .0001                                     | 50944                    | 7.38                          | -14                           | -50 | 32  |
|                               | PG < controls | cingulate gyrus           | R     | .0078                                       | 567                      | 3.67                          | 18                            | 20  | 30  |
|                               | PG > controls | putamen                   | R     | .0022                                       | 685                      | 3.46                          | 26                            | 0   | -2  |
| Right ventral<br>striatum     | mean positive | nucleus accumbens         | R     | < .0001                                     | 9132                     | 9.2                           | 4                             | 6   | -8  |
|                               | mean negative | precentral gyrus          | L     | < .0001                                     | 18107                    | 5.34                          | -50                           | 2   | 20  |
|                               |               | lingual gyrus             | L     | < .0001                                     | 2974                     | 4.68                          | -8                            | -80 | -12 |
|                               | PG < controls |                           |       | not significant                             |                          |                               |                               |     |     |
|                               | PG > controls | cerebellum                | L     | .0024                                       | 672                      | 4.4                           | -32                           | -52 | -38 |
| superior frontal gyrus        |               | R                         | .0065 | 581                                         | 3.92                     | 26                            | 26                            | 50  |     |
